# Supplementary material for: Promoting readthrough of nonsense mutations in CF mouse model: Biodistribution and efficacy of NV848 in rescuing CFTR protein expression
Source: PubMed Central journal article supplement — Mol Ther. 2024 Oct 28;32(12):4514–23. doi: 10.1016/j.ymthe.2024.10.028 (PMC11638873; doi:10.1016/j.ymthe.2024.10.028), 2024-10-28
Supplement: mmc1.pdf [file mmc1.pdf]

## **Supplemental Information**

### **Promoting readthrough of nonsense mutations in CF mouse model: Biodistribution and efficacy of NV848 in rescuing CFTR protein expression**

**Ignazio Fiduccia, Federica Corrao, Maria Grazia Zizzo, Riccardo Perriera, Francesco Genovese, Emanuele Vitale, Davide Ricci, Raffaella Melfi, Marco Tutone, Andrea Pace, Laura Lentini, and Ivana Pibiri**

**Table S1.** Mice body weight at  $T^0$  and  $T^{15}$  days.

|                                  | CFTR <sup>WT</sup> |       | CFTR <sup>G542X/G542X</sup> |       |
|----------------------------------|--------------------|-------|-----------------------------|-------|
|                                  | g                  | ± SEM | g                           | ± SEM |
| <b>Weight treatment</b> $t^0$    | 11.8               | 0.8   | 8.2                         | 1.0   |
| <b>Weight treatment</b> $t^{15}$ | 17.4               | 0.9   | 14.0                        | 0.8   |

**Table S2.** Sequence of primers used for DNA amplification to detect CFTR WT (primers P3 and P2) and CFTR G542X (primers P1 and P2) alleles.

| <i>Name</i> | <i>Nucleotide Sequence</i>                  | <i>Type of primer</i> | <i>Allele identified</i> |
|-------------|---------------------------------------------|-----------------------|--------------------------|
| P 1         | 5' – ACA AGA CAA CAC AGT TCT <b>CT</b> – 3' | Forward               | CFTR G542X               |
| P 2         | 5' – TCC ATG CAC CAT AAC AAC AAG T – 3'     | Reverse               | CFTR (Common)            |
| P 3         | 5' – ACA AGA CAA CAC AGT TCT <b>TG</b> – 3' | Forward               | CFTR WT                  |

**Table S3.** Primer sequences for real-time RT PCR to calculate relative gene expression for the CFTR gene.

| <i>Gene</i>        |         | <i>Nucleotide Sequence</i>       |                                                                   |
|--------------------|---------|----------------------------------|-------------------------------------------------------------------|
| <b>CFTR mouse</b>  | FORWARD | 5' – CTACATGGAACACATACCTTCG - 3' | <i>Divangahi M., et al., 2009</i>                                 |
| <b>CFTR mouse</b>  | REVERSE | 5' – GGTGATAATCACTGCATAGC – 3'   | <i>Divangahi M., et al., 2009</i>                                 |
| <b>ACTIN mouse</b> | FORWARD | 5' – ACCGTCAAAAGATGACCCAGA- 3'   | <i>Designed with Primer Express software (Applied Biosystems)</i> |
| <b>ACTIN mouse</b> | REVERSE | 5' – GAGGCATACAGGGACAGCACA – 3'  | <i>Designed with Primer Express software (Applied Biosystems)</i> |
